# Supplementary material
Source: MDPI journal article supplement (https://www.mdpi.com/2306-5710/2/4/26)
Supplement: s1 [file s1]

# Supplementary Materials: Influence of Sample Storage on the Composition of Carbonated Beverages by MIR Spectroscopy

Karma Pearce, Julie Culbert, Diane Cass, Daniel Cozzolino and Kerry Wilkinson

**Table S1.** Significant changes in titratable acidity (TA) and/or total phenolics of beer and cider following short-term (1 week) refrigeration or freezing or long-term (6 week) freezing.

|         |                      | Fresh      | Refrigerated<br>(1 Week) | Frozen<br>(1 Week)      | Frozen<br>(6 Weeks)     |
|---------|----------------------|------------|--------------------------|-------------------------|-------------------------|
| Beer A  | TA (g/L)             | 1.9 ± 0.1  | 2.3 ± 0.2                | 2.1 ± 0.2               | 2.6 ± 0.4 <sup>a</sup>  |
|         | Total phenolics (au) | 11.7 ± 0.5 | 11.0 ± 0.3 <sup>b</sup>  | 11.3 ± 0.2              | 10.6 ± 1.2 <sup>b</sup> |
| Beer B  | TA (g/L)             | 2.1 ± 0.1  | 2.3 ± 0.1                | 2.3 ± 0.2               | 2.6 ± 0.3 <sup>a</sup>  |
|         | Total phenolics (au) | 15.0 ± 0.1 | 14.1 ± 0.3               | 13.5 ± 1.1 <sup>b</sup> | 13.8 ± 1.1 <sup>b</sup> |
| Beer C  | TA (g/L)             | 2.0 ± 0.1  | 2.2 ± 0.2                | 1.9 ± 0.2 <sup>c</sup>  | 1.7 ± 0.3 <sup>a</sup>  |
|         | Total phenolics (au) | 12.1 ± 0.2 | 10.1 ± 1.7 <sup>a</sup>  | 10.8 ± 1.1              | 10.9 ± 0.8              |
| Beer D  | TA (g/L)             | 1.4 ± 0.1  | 1.4 ± 0.1                | 1.3 ± 0.1               | 1.2 ± 0.2 <sup>b</sup>  |
|         | Total phenolics (au) | 10.5 ± 0.2 | 10.6 ± 0.3               | 6.1 ± 2.0 <sup>a</sup>  | 8.8 ± 0.8 <sup>b</sup>  |
| Cider A | TA (g/L)             | 6.7 ± 0.1  | 6.8 ± 0.1                | 6.6 ± 0.1               | 6.9 ± 0.1 <sup>c</sup>  |
|         | Total phenolics (au) | 17.9 ± 0.2 | 16.4 ± 0.4               | 16.6 ± 0.1              | 16.2 ± 0.2 <sup>a</sup> |
| Cider B | Total phenolics (au) | 30.8 ± 0.6 | 29.7 ± 1.3               | 28.9 ± 1.8 <sup>a</sup> | 29.5 ± 1.1 <sup>b</sup> |
| Cider C | TA (g/L)             | 7.2 ± 0.1  | 7.2 ± 0.1                | 6.9 ± 0.1 <sup>b</sup>  | 7.1 ± 0.4 <sup>c</sup>  |
|         | Total phenolics (au) | 18.8 ± 0.3 | 18.7 ± 0.4               | 17.7 ± 0.1 <sup>b</sup> | 17.4 ± 1.3 <sup>a</sup> |
| Cider D | TA (g/L)             | 7.0 ± 0.2  | 7.1 ± 0.2                | 6.8 ± 0.2               | 6.1 ± 0.3 <sup>c</sup>  |
|         | Total phenolics (au) | 15.1 ± 0.3 | 14.9 ± 0.2 <sup>c</sup>  | 14.7 ± 0.3 <sup>a</sup> | 14.3 ± 1.1 <sup>a</sup> |

Values are the means from ten experimental replicates ( $n = 10$ ). All samples were degassed prior to analysis. TA was measured as malic acid equivalents for beer and cider, to endpoints of 8.2. Total phenolics were measured at  $A_{280}$ . Color was measured at  $A_{430}$ . Letters indicate significant differences relative to the fresh sample (a:  $P < 0.001$ ; b:  $P < 0.01$ ; c:  $P < 0.05$ ).
